# Supplementary material for: Genome-Wide Analysis of Specific PfR2R3-MYB Genes Related to Paulownia Witches’ Broom
Source: MDPI journal article supplement (doi:10.3390/genes14010007), 2022-12-20
Supplement: s1 [file s1]

**Table S7** The KA/KS analysis of PfR2R3-MYBs genes.

| Seq_1          | Seq_2          | Ka          | Ks          | Ka/Ks       | Date (MYA)  |
|----------------|----------------|-------------|-------------|-------------|-------------|
| Pfo11g003610.1 | Pfo12g002450.1 | 0.363444061 | 5.094258321 | 0.071343862 | 275.0899493 |
| Pfo02g019480.1 | Pfo04g000700.1 | 0.03347633  | 0.388692668 | 0.086125449 | 20.98940407 |
| Pfo02g002310.1 | Pfo10g004020.1 | 0.357676046 | 4.022210846 | 0.088925235 | 217.1993857 |
| Pfo05g004610.1 | Pfo11g003610.1 | 0.339917597 | 3.666148942 | 0.092717891 | 197.9720429 |
| Pfo07g008020.1 | Pfo18g011550.1 | 0.054804179 | 0.561703905 | 0.097567738 | 30.33201087 |
| Pfo04g010480.1 | Pfo12g003940.1 | 0.389896807 | 3.931310261 | 0.099177318 | 212.2907541 |
| Pfo05g000500.1 | Pfo19g000480.1 | 0.271511682 | 2.420721462 | 0.112161472 | 130.7189589 |
| Pfo11g000320.1 | Pfo19g000480.1 | 0.045294068 | 0.392971576 | 0.115260418 | 21.2204651  |
| Pfo05g004610.1 | Pfo19g005800.1 | 0.359874222 | 3.061624075 | 0.117543569 | 165.3277001 |
| Pfo04g013370.1 | Pfo20g008050.1 | 0.411131028 | 3.486890304 | 0.117907646 | 188.2920764 |
| Pfo11g004370.1 | Pfo19g006890.1 | 0.076321218 | 0.626396129 | 0.121841778 | 33.82539097 |
| Pfo13g007390.1 | Pfo15g010010.1 | 0.408536082 | 3.337226678 | 0.12241784  | 180.2102406 |
| Pfo07g010710.1 | Pfo18g009290.1 | 0.057162739 | 0.462263561 | 0.123658328 | 24.96223229 |
| Pfo11g010810.1 | Pfo15g010910.1 | 0.092019229 | 0.693703903 | 0.132649143 | 37.46001076 |
| Pfo12g002450.1 | Pfo19g005800.1 | 0.371996629 | 2.766796439 | 0.134450306 | 149.4070077 |
| Pfo06g002230.1 | Pfo13g001480.1 | 0.081738857 | 0.559937174 | 0.145978623 | 30.2366074  |
| Pfo01g008330.1 | Pfo03g003220.1 | 0.070003083 | 0.45140118  | 0.155079529 | 24.37566372 |
| Pfo06g013990.1 | Pfo08g004250.1 | 0.329346964 | 2.008994762 | 0.163936198 | 108.4857171 |
| Pfo02g006850.1 | Pfo04g010480.1 | 0.081999668 | 0.497890449 | 0.164694197 | 26.88608425 |
| Pfo06g008290.1 | Pfo13g006030.1 | 0.093764278 | 0.56548517  | 0.16581209  | 30.53619918 |
| Pfo06g009750.1 | Pfo15g010010.1 | 0.441948189 | 2.665164547 | 0.165823979 | 143.9188855 |
| Pfo13g008090.1 | Pfo15g010910.1 | 0.361788428 | 2.145989576 | 0.168588157 | 115.8834371 |
| Pfo06g013730.1 | Pfo13g010060.1 | 0.067407006 | 0.390305684 | 0.172703111 | 21.07650694 |
| Pfo13g010210.1 | Pfo14g008500.1 | 0.374557481 | 2.124910008 | 0.176269809 | 114.7451404 |
| Pfo11g011230.1 | Pfo15g011750.1 | 0.088846565 | 0.498925253 | 0.178075903 | 26.94196366 |
| Pfo09g006030.1 | Pfo16g001650.1 | 0.345819672 | 1.889998477 | 0.182973519 | 102.0599178 |
| Pfo09g006030.1 | Pfo16g011210.1 | 0.081883828 | 0.423289301 | 0.193446486 | 22.85762225 |
| Pfo06g016400.1 | Pfo17g007100.1 | 0.350996543 | 1.811696137 | 0.19373919  | 97.8315914  |
| Pfo07g012180.1 | Pfo18g007310.1 | 0.085401353 | 0.433264177 | 0.197111502 | 23.39626556 |
| Pfo08g004250.1 | Pfo14g008500.1 | 0.072799872 | 0.363699186 | 0.200165067 | 19.63975604 |
| Pfo11g010810.1 | Pfo13g008090.1 | 0.365078865 | 1.7837483   | 0.204669496 | 96.3224082  |
| Pfo02g016300.1 | Pfo15g010910.1 | 0.487766154 | 2.294266509 | 0.21260222  | 123.8903915 |
| Pfo02g004240.1 | Pfo04g012220.1 | 0.083392545 | 0.388876399 | 0.214444861 | 20.99932555 |
| Pfo07g000840.1 | Pfo17g007100.1 | 0.082508735 | 0.377975995 | 0.21829094  | 20.41070373 |
| Pfo02g002310.1 | Pfo20g008050.1 | 0.374425888 | 1.705271206 | 0.2195697   | 92.08464512 |
| Pfo07g002780.1 | Pfo17g004370.1 | 0.068537292 | 0.303692657 | 0.225679781 | 16.39940348 |
| Pfo03g012350.1 | Pfo05g013420.1 | 0.363993209 | 1.608005751 | 0.226363126 | 86.83231055 |
| Pfo05g013420.1 | Pfo12g006860.1 | 0.0634585   | 0.279722246 | 0.226862541 | 15.10500128 |
| Pfo06g015500.1 | Pfo13g010980.1 | 0.068106922 | 0.298042271 | 0.228514304 | 16.09428263 |
| Pfo06g013990.1 | Pfo13g010210.1 | 0.075487489 | 0.328647813 | 0.229691133 | 17.7469819  |

|                |                |             |             |             |              |
|----------------|----------------|-------------|-------------|-------------|--------------|
| Pfo08g001950.1 | Pfo14g010110.1 | 0.06682958  | 0.290607053 | 0.229965443 | 15. 69278086 |
| Pfo02g006850.1 | Pfo12g003940.1 | 0.395703826 | 1.71045464  | 0.231344238 | 92. 36455056 |
| Pfo11g000840.1 | Pfo12g000400.1 | 0.561675654 | 2.400839327 | 0.233949706 | 129. 6453237 |
| Pfo06g014510.1 | Pfo08g003540.1 | 0.555043    | 2.349245363 | 0.23626438  | 126. 8592496 |
| Pfo03g012350.1 | Pfo12g006860.1 | 0.397729469 | 1.625387094 | 0.244698306 | 87. 77090308 |
| Pfo10g004020.1 | Pfo20g008050.1 | 0.075314061 | 0.301780437 | 0.249565749 | 16. 2961436  |
| Pfo11g013900.1 | Pfo15g003730.1 | 0.083176935 | 0.332010966 | 0.250524661 | 17. 92859216 |
| Pfo06g013830.1 | Pfo17g003900.1 | 0.588806571 | 2.316514836 | 0.254177768 | 125. 0918011 |
| Pfo08g004250.1 | Pfo13g010210.1 | 0.368061189 | 1.420135117 | 0.259173359 | 76. 68729632 |
| Pfo06g013830.1 | Pfo07g003110.1 | 0.618933926 | 2.348795135 | 0.263511243 | 126. 8349373 |
| Pfo16g001650.1 | Pfo16g011210.1 | 0.402640635 | 1.502267408 | 0.268021946 | 81. 12244003 |
| Pfo11g003610.1 | Pfo19g005800.1 | 0.115088131 | 0.416221075 | 0.276507216 | 22. 47593805 |
| Pfo09g015360.1 | Pfo16g001600.1 | 0.142374863 | 0.50227164  | 0.28346188  | 27. 12266856 |
| Pfo01g008980.1 | Pfo03g002780.1 | 0.141520732 | 0.491926393 | 0.287686804 | 26. 56402522 |
| Pfo08g002380.1 | Pfo14g009740.1 | 0.130498455 | 0.449826149 | 0.290108646 | 24. 29061205 |
| Pfo07g003110.1 | Pfo17g003900.1 | 0.098668854 | 0.338309095 | 0.291652976 | 18. 26869113 |
| Pfo07g005000.1 | Pfo17g001350.1 | 0.125627672 | 0.428956423 | 0.292868147 | 23. 16364684 |
| Pfo07g008480.1 | Pfo18g012080.1 | 0.16090086  | 0.546997261 | 0.294152954 | 29. 53785209 |
| Pfo07g003210.1 | Pfo17g003780.1 | 0.123154859 | 0.41301448  | 0.29818533  | 22. 30278192 |
| Pfo02g011810.1 | Pfo04g005500.1 | 0.172639824 | 0.565757056 | 0.305148336 | 30. 55088102 |
| Pfo09g010090.1 | Pfo16g008690.1 | 0.135128219 | 0.437007174 | 0.309212817 | 23. 5983874  |
| Pfo09g009390.1 | Pfo16g008130.1 | 0.125134833 | 0.401813539 | 0.311425127 | 21. 69793111 |
| Pfo05g007870.1 | Pfo12g004970.1 | 0.108564247 | 0.340259905 | 0.31906271  | 18. 37403487 |
| Pfo06g009750.1 | Pfo13g007390.1 | 0.138836968 | 0.429764683 | 0.32305346  | 23. 20729288 |
| Pfo12g000400.1 | Pfo19g001230.1 | 0.529426295 | 1.633407702 | 0.32412379  | 88. 20401591 |
| Pfo02g002310.1 | Pfo04g013370.1 | 0.10991815  | 0.327717126 | 0.335405572 | 17. 6967248  |
| Pfo11g003950.1 | Pfo19g006280.1 | 0.260602706 | 0.748137129 | 0.34833548  | 40. 39940497 |
| Pfo08g000980.1 | Pfo14g010660.1 | 0.181763275 | 0.505251633 | 0.35974802  | 27. 28358818 |
| Pfo05g004610.1 | Pfo12g002450.1 | 0.133505835 | 0.361629763 | 0.369178228 | 19. 5280072  |
| Pfo06g012720.1 | Pfo13g009450.1 | 0.150953364 | 0.394221071 | 0.382915514 | 21. 28793783 |
| Pfo01g009160.1 | Pfo03g002570.1 | 0.088381288 | 0.223244844 | 0.395893972 | 12. 05522158 |
| Pfo11g000840.1 | Pfo19g001230.1 | 0.135488564 | 0.34104939  | 0.397269627 | 18. 41666706 |
| Pfo08g014110.1 | Pfo14g000740.1 | 0.097381314 | 0.234606907 | 0.415082894 | 12. 66877298 |
| Pfo10g008590.1 | Pfo20g005080.1 | 0.152434458 | 0.367188653 | 0.415139348 | 19. 82818726 |
| Pfo02g008560.1 | Pfo04g008950.1 | 0.122920651 | 0.267578622 | 0.459381435 | 14. 44924559 |
| Pfo10g004030.1 | Pfo20g008040.1 | 0.180902165 | 0.385487018 | 0.46928212  | 20. 81629897 |
| Pfo06g009270.1 | Pfo13g006990.1 | 0.313236525 | 0.606206742 | 0.516715673 | 32. 73516407 |
| Pfo08g013680.1 | Pfo14g001120.1 | 0.154180683 | 0.282637794 | 0.54550625  | 15. 26244088 |

---
