# Supplementary material for: Genome-Wide Analysis of Specific PfR2R3-MYB Genes Related to Paulownia Witches’ Broom
Source: MDPI journal article supplement (doi:10.3390/genes14010007), 2022-12-20
Supplement: s1 [file s1]

**Table S6** Identification of *R2R3-MYB* gene family members of paulownia and analysis of their physicochemical properties.

| Gene name           | Gene ID              | CDS/bp | Strand | Amino acid | Relative molecular mass | Atomic composition                                                                    | Isoelectric point | Subcellular location |
|---------------------|----------------------|--------|--------|------------|-------------------------|---------------------------------------------------------------------------------------|-------------------|----------------------|
| <i>PjR2R3-MYB1</i>  | Paulownia_LG1G000802 | 1065   | —      | 354        | 40,194.04               | C <sub>1759</sub> H <sub>2743</sub> N <sub>491</sub> O <sub>557</sub> S <sub>16</sub> | 5.52              | Nucleus              |
| <i>PjR2R3-MYB2</i>  | Paulownia_LG1G000867 | 741    | +      | 321        | 36,000.41               | C <sub>1576</sub> H <sub>2448</sub> N <sub>444</sub> O <sub>492</sub> S <sub>16</sub> | 6.36              | Nucleus              |
| <i>PjR2R3-MYB3</i>  | Paulownia_LG1G000885 | 1134   | —      | 377        | 42,538.42               | C <sub>1840</sub> H <sub>2869</sub> N <sub>565</sub> O <sub>570</sub> S <sub>16</sub> | 9.04              | Nucleus              |
| <i>PjR2R3-MYB4</i>  | Paulownia_LG0G000043 | 939    | +      | 312        | 35,605.89               | C <sub>1540</sub> H <sub>2414</sub> N <sub>472</sub> O <sub>474</sub> S <sub>15</sub> | 8.71              | Nucleus              |
| <i>PjR2R3-MYB5</i>  | Paulownia_LG0G000230 | 954    | —      | 317        | 35,588.85               | C <sub>1551</sub> H <sub>2423</sub> N <sub>439</sub> O <sub>493</sub> S <sub>15</sub> | 6.35              | Nucleus              |
| <i>PjR2R3-MYB6</i>  | Paulownia_LG0G000419 | 954    | —      | 317        | 35,426.97               | C <sub>1588</sub> H <sub>2465</sub> N <sub>427</sub> O <sub>481</sub> S <sub>6</sub>  | 6.16              | Nucleus              |
| <i>PjR2R3-MYB7</i>  | Paulownia_LG0G000672 | 1050   | +      | 349        | 38,818.62               | C <sub>1687</sub> H <sub>2641</sub> N <sub>479</sub> O <sub>534</sub> S <sub>20</sub> | 5.37              | Nucleus              |
| <i>PjR2R3-MYB8</i>  | Paulownia_LG0G000840 | 1632   | +      | 543        | 59,030.37               | C <sub>2563</sub> H <sub>3939</sub> N <sub>705</sub> O <sub>844</sub> S <sub>28</sub> | 4.81              | Nucleus              |
| <i>PjR2R3-MYB9</i>  | Paulownia_LG0G001590 | 837    | —      | 278        | 30,326.13               | C <sub>1309</sub> H <sub>2124</sub> N <sub>394</sub> O <sub>418</sub> S <sub>8</sub>  | 7.74              | Nucleus              |
| <i>PjR2R3-MYB10</i> | Paulownia_LG0G001904 | 759    | —      | 252        | 28,170.72               | C <sub>1212</sub> H <sub>1945</sub> N <sub>367</sub> O <sub>383</sub> S <sub>12</sub> | 8.77              | Nucleus              |
| <i>PjR2R3-MYB11</i> | Paulownia_LG2G000207 | 1143   | +      | 380        | 42,945.20               | C <sub>1872</sub> H <sub>2907</sub> N <sub>565</sub> O <sub>565</sub> S <sub>18</sub> | 8.98              | Nucleus              |
| <i>PjR2R3-MYB12</i> | Paulownia_LG2G000208 | 843    | +      | 280        | 32,093.00               | C <sub>1404</sub> H <sub>2171</sub> N <sub>425</sub> O <sub>419</sub> S <sub>12</sub> | 9.26              | Nucleus              |
| <i>PjR2R3-MYB13</i> | Paulownia_LG2G000288 | 1056   | +      | 351        | 39,717.55               | C <sub>1739</sub> H <sub>2699</sub> N <sub>483</sub> O <sub>548</sub> S <sub>18</sub> | 5.62              | Nucleus              |
| <i>PjR2R3-MYB14</i> | Paulownia_LG2G000521 | 666    | —      | 221        | 25,659.39               | C <sub>1146</sub> H <sub>1810</sub> N <sub>318</sub> O <sub>335</sub> S <sub>8</sub>  | 8.99              | Nucleus              |
| <i>PjR2R3-MYB15</i> | Paulownia_LG2G000709 | 843    | +      | 280        | 30,922.59               | C <sub>1360</sub> H <sub>2104</sub> N <sub>368</sub> O <sub>433</sub> S <sub>12</sub> | 5.45              | Nucleus              |
| <i>PjR2R3-MYB16</i> | Paulownia_LG2G001188 | 1017   | +      | 338        | 37,868.27               | C <sub>1653</sub> H <sub>2542</sub> N <sub>468</sub> O <sub>520</sub> S <sub>18</sub> | 7.89              | Nucleus              |
| <i>PjR2R3-MYB17</i> | Paulownia_LG2G001328 | 1083   | —      | 360        | 41,173.18               | C <sub>1818</sub> H <sub>2922</sub> N <sub>534</sub> O <sub>533</sub> S <sub>12</sub> | 9.06              | Nucleus              |
| <i>PjR2R3-MYB18</i> | Paulownia_LG3G000069 | 771    | +      | 256        | 28,659.42               | C <sub>1233</sub> H <sub>1989</sub> N <sub>375</sub> O <sub>386</sub> S <sub>13</sub> | 9.09              | Nucleus              |
| <i>PjR2R3-MYB19</i> | Paulownia_LG3G000553 | 1143   | —      | 380        | 42,535.77               | C <sub>1871</sub> H <sub>2912</sub> N <sub>542</sub> O <sub>570</sub> S <sub>13</sub> | 9.39              | Nucleus              |
| <i>PjR2R3-MYB20</i> | Paulownia_LG3G000878 | 1641   | +      | 521        | 56,620.01               | C <sub>2476</sub> H <sub>3819</sub> N <sub>679</sub> O <sub>799</sub> S <sub>23</sub> | 5.08              | Nucleus              |
| <i>PjR2R3-MYB21</i> | Paulownia_LG3G001030 | 1017   | —      | 338        | 37,578.49               | C <sub>1627</sub> H <sub>2556</sub> N <sub>464</sub> O <sub>510</sub> S <sub>25</sub> | 5.45              | Nucleus              |
| <i>PjR2R3-MYB22</i> | Paulownia_LG3G001206 | 714    | +      | 237        | 26,901.16               | C <sub>1201</sub> H <sub>1849</sub> N <sub>335</sub> O <sub>362</sub> S <sub>4</sub>  | 5.73              | Nucleus              |
| <i>PjR2R3-MYB23</i> | Paulownia_LG3G001325 | 1014   | +      | 337        | 37,409.06               | C <sub>1623</sub> H <sub>2561</sub> N <sub>471</sub> O <sub>512</sub> S <sub>17</sub> | 8.27              | Nucleus              |
| <i>PjR2R3-MYB24</i> | Paulownia_LG4G000458 | 756    | +      | 251        | 28,373.29               | C <sub>1233</sub> H <sub>1882</sub> N <sub>352</sub> O <sub>399</sub> S <sub>11</sub> | 4.98              | Nucleus              |
| <i>PjR2R3-MYB25</i> | Paulownia_LG4G000782 | 1653   | —      | 550        | 59,982.77               | C <sub>2595</sub> H <sub>4064</sub> N <sub>724</sub> O <sub>857</sub> S <sub>27</sub> | 5.23              | Nucleus              |
| <i>PjR2R3-MYB26</i> | Paulownia_LG4G001152 | 738    | +      | 245        | 28,438.88               | C <sub>1248</sub> H <sub>1917</sub> N <sub>355</sub> O <sub>383</sub> S <sub>13</sub> | 7.74              | Nucleus              |
| <i>PjR2R3-MYB27</i> | Paulownia_LG4G001329 | 1005   | —      | 334        | 37,665.39               | C <sub>1661</sub> H <sub>2545</sub> N <sub>451</sub> O <sub>512</sub> S <sub>20</sub> | 6.53              | Nucleus              |
| <i>PjR2R3-MYB28</i> | Paulownia_LG5G000219 | 1128   | +      | 375        | 41,801.67               | C <sub>1875</sub> H <sub>2902</sub> N <sub>504</sub> O <sub>549</sub> S <sub>16</sub> | 6.56              | Nucleus              |
| <i>PjR2R3-MYB29</i> | Paulownia_LG5G000372 | 951    | —      | 316        | 35,503.58               | C <sub>1547</sub> H <sub>2412</sub> N <sub>420</sub> O <sub>508</sub> S <sub>15</sub> | 4.75              | Nucleus              |
| <i>PjR2R3-MYB30</i> | Paulownia_LG5G000622 | 837    | +      | 278        | 31,088.95               | C <sub>1352</sub> H <sub>2094</sub> N <sub>400</sub> O <sub>412</sub> S <sub>17</sub> | 9.14              | Nucleus              |
| <i>PjR2R3-MYB31</i> | Paulownia_LG5G000817 | 1140   | —      | 379        | 43,464.00               | C <sub>1936</sub> H <sub>3078</sub> N <sub>544</sub> O <sub>561</sub> S <sub>16</sub> | 9.40              | Nucleus              |
| <i>PjR2R3-MYB32</i> | Paulownia_LG5G000892 | 723    | +      | 240        | 27,059.57               | C <sub>1176</sub> H <sub>1891</sub> N <sub>343</sub> O <sub>371</sub> S <sub>9</sub>  | 9.03              | Nucleus              |
| <i>PjR2R3-MYB33</i> | Paulownia_LG5G000913 | 867    | —      | 288        | 33,025.32               | C <sub>1458</sub> H <sub>2304</sub> N <sub>422</sub> O <sub>441</sub> S <sub>7</sub>  | 9.15              | Nucleus              |
| <i>PjR2R3-MYB34</i> | Paulownia_LG5G000915 | 894    | —      | 297        | 34,103.25               | C <sub>1497</sub> H <sub>2339</sub> N <sub>439</sub> O <sub>458</sub> S <sub>9</sub>  | 8.78              | Nucleus              |
| <i>PjR2R3-MYB35</i> | Paulownia_LG5G000961 | 1050   | +      | 349        | 39,304.30               | C <sub>1731</sub> H <sub>2680</sub> N <sub>480</sub> O <sub>532</sub> S <sub>18</sub> | 6.51              | Nucleus              |
| <i>PjR2R3-MYB36</i> | Paulownia_LG5G001256 | 720    | —      | 239        | 27,564.86               | C <sub>1221</sub> H <sub>1858</sub> N <sub>352</sub> O <sub>363</sub> S <sub>9</sub>  | 8.68              | Nucleus              |
| <i>PjR2R3-MYB37</i> | Paulownia_LG5G001353 | 1161   | —      | 386        | 41,930.41               | C <sub>1814</sub> H <sub>2824</sub> N <sub>530</sub> O <sub>589</sub> S <sub>14</sub> | 6.28              | Nucleus              |

| <i>PfR2R3-MYB38</i> | Paulownia_LG5G001363  | 1104   | +      | 367        | 41,573.58               | C <sub>1791</sub> H <sub>2797</sub> N <sub>541</sub> O <sub>558</sub> S <sub>23</sub>   | 8.65              | Nucleus              |
|---------------------|-----------------------|--------|--------|------------|-------------------------|-----------------------------------------------------------------------------------------|-------------------|----------------------|
| Gene name           | Gene ID               | CDS/bp | Strand | Amino acid | relative molecular mass | Atomic composition                                                                      | Isoelectric point | Subcellular location |
| <i>PfR2R3-MYB39</i> | Paulownia_LG5G001379  | 981    | —      | 326        | 36,613.66               | C <sub>1600</sub> H <sub>2475</sub> N <sub>447</sub> O <sub>516</sub> S <sub>12</sub>   | 5.88              | Nucleus              |
| <i>PfR2R3-MYB40</i> | Paulownia_LG5G001432  | 1086   | +      | 361        | 40,771.64               | C <sub>1794</sub> H <sub>2766</sub> N <sub>496</sub> O <sub>561</sub> S <sub>16</sub>   | 5.70              | Nucleus              |
| <i>PfR2R3-MYB41</i> | Paulownia_LG5G001535  | 582    | —      | 193        | 22,101.82               | C <sub>960</sub> H <sub>1495</sub> N <sub>285</sub> O <sub>295</sub> S <sub>11</sub>    | 7.01              | Nucleus              |
| <i>PfR2R3-MYB42</i> | Paulownia_LG5G001541  | 1173   | +      | 390        | 44,426.62               | C <sub>1931</sub> H <sub>3007</sub> N <sub>557</sub> O <sub>612</sub> S <sub>19</sub>   | 5.93              | Nucleus              |
| <i>PfR2R3-MYB43</i> | Paulownia_LG5G001628  | 843    | —      | 280        | 32,375.35               | C <sub>1396</sub> H <sub>2197</sub> N <sub>409</sub> O <sub>443</sub> S <sub>18</sub>   | 6.02              | Nucleus              |
| <i>PfR2R3-MYB44</i> | Paulownia_LG7G000084  | 693    | +      | 230        | 26,488.34               | C <sub>1155</sub> H <sub>1818</sub> N <sub>330</sub> O <sub>345</sub> S <sub>20</sub>   | 8.13              | Nucleus              |
| <i>PfR2R3-MYB45</i> | Paulownia_LG7G000249  | 1461   | —      | 486        | 54,619.30               | C <sub>2352</sub> H <sub>3758</sub> N <sub>688</sub> O <sub>761</sub> S <sub>24</sub>   | 6.39              | Nucleus              |
| <i>PfR2R3-MYB46</i> | Paulownia_LG7G000282  | 1260   | —      | 419        | 45,929.97               | C <sub>2002</sub> H <sub>3061</sub> N <sub>571</sub> O <sub>635</sub> S <sub>20</sub>   | 6.08              | Nucleus              |
| <i>PfR2R3-MYB47</i> | Paulownia_LG7G000292  | 1026   | +      | 341        | 38,132.24               | C <sub>1677</sub> H <sub>2651</sub> N <sub>487</sub> O <sub>505</sub> S <sub>13</sub>   | 9.24              | Nucleus              |
| <i>PfR2R3-MYB48</i> | Paulownia_LG7G000293  | 1185   | +      | 394        | 43,748.86               | C <sub>1945</sub> H <sub>3037</sub> N <sub>539</sub> O <sub>575</sub> S <sub>18</sub>   | 8.13              | Nucleus              |
| <i>PfR2R3-MYB49</i> | Paulownia_LG7G000468  | 873    | +      | 290        | 33,010.18               | C <sub>1450</sub> H <sub>2259</sub> N <sub>407</sub> O <sub>448</sub> S <sub>14</sub>   | 7.60              | Nucleus              |
| <i>PfR2R3-MYB50</i> | Paulownia_LG7G000770  | 906    | +      | 301        | 33,562.14               | C <sub>1479</sub> H <sub>2364</sub> N <sub>422</sub> O <sub>451</sub> S <sub>9</sub>    | 8.99              | Nucleus              |
| <i>PfR2R3-MYB51</i> | Paulownia_LG7G000814  | 957    | —      | 318        | 35,611.06               | C <sub>1582</sub> H <sub>2469</sub> N <sub>437</sub> O <sub>486</sub> S <sub>7</sub>    | 5.99              | Nucleus              |
| <i>PfR2R3-MYB52</i> | Paulownia_LG7G001038  | 822    | +      | 273        | 31,006.69               | C <sub>1341</sub> H <sub>2088</sub> N <sub>388</sub> O <sub>426</sub> S <sub>17</sub>   | 5.08              | Nucleus              |
| <i>PfR2R3-MYB53</i> | Paulownia_LG7G001184  | 996    | —      | 331        | 37,655.15               | C <sub>1647</sub> H <sub>2543</sub> N <sub>467</sub> O <sub>514</sub> S <sub>17</sub>   | 5.82              | Nucleus              |
| <i>PfR2R3-MYB54</i> | Paulownia_LG6G000128  | 762    | +      | 253        | 29,095.48               | C <sub>1257</sub> H <sub>1969</sub> N <sub>395</sub> O <sub>385</sub> S <sub>10</sub>   | 9.11              | Nucleus              |
| <i>PfR2R3-MYB55</i> | Paulownia_LG6G000225  | 1116   | —      | 371        | 42,415.46               | C <sub>1852</sub> H <sub>2860</sub> N <sub>526</sub> O <sub>580</sub> S <sub>20</sub>   | 6.10              | Nucleus              |
| <i>PfR2R3-MYB56</i> | Paulownia_LG6G000269  | 1377   | —      | 458        | 52,527.89               | C <sub>2341</sub> H <sub>3559</sub> N <sub>631</sub> O <sub>713</sub> S <sub>18</sub>   | 5.28              | Nucleus              |
| <i>PfR2R3-MYB57</i> | Paulownia_LG6G000458  | 978    | +      | 325        | 36,063.13               | C <sub>1569</sub> H <sub>2453</sub> N <sub>445</sub> O <sub>508</sub> S <sub>12</sub>   | 5.85              | Nucleus              |
| <i>PfR2R3-MYB58</i> | Paulownia_LG6G001343  | 1176   | —      | 391        | 43,213.98               | C <sub>1907</sub> H <sub>2951</sub> N <sub>519</sub> O <sub>581</sub> S <sub>24</sub>   | 5.68              | Nucleus              |
| <i>PfR2R3-MYB59</i> | Paulownia_LG6G001386  | 585    | —      | 194        | 21,859.59               | C <sub>949</sub> H <sub>1517</sub> N <sub>287</sub> O <sub>295</sub> S <sub>6</sub>     | 9.28              | Nucleus              |
| <i>PfR2R3-MYB60</i> | Paulownia_LG8G000013  | 999    | —      | 332        | 37,056.18               | C <sub>1597</sub> H <sub>2477</sub> N <sub>473</sub> O <sub>511</sub> S <sub>18</sub>   | 6.48              | Nucleus              |
| <i>PfR2R3-MYB61</i> | Paulownia_LG8G000599  | 1155   | +      | 384        | 43,621.61               | C <sub>1897</sub> H <sub>2963</sub> N <sub>541</sub> O <sub>610</sub> S <sub>16</sub>   | 5.64              | Nucleus              |
| <i>PfR2R3-MYB62</i> | Paulownia_LG8G000927  | 1056   | —      | 351        | 39,382.66               | C <sub>1711</sub> H <sub>2661</sub> N <sub>487</sub> O <sub>557</sub> S <sub>13</sub>   | 5.68              | Nucleus              |
| <i>PfR2R3-MYB63</i> | Paulownia_LG8G000997  | 789    | —      | 262        | 29,488.34               | C <sub>1293</sub> H <sub>2021</sub> N <sub>377</sub> O <sub>389</sub> S <sub>13</sub>   | 8.53              | Nucleus              |
| <i>PfR2R3-MYB64</i> | Paulownia_LG8G001506  | 813    | —      | 270        | 30,945.32               | C <sub>1375</sub> H <sub>2073</sub> N <sub>375</sub> O <sub>427</sub> S <sub>8</sub>    | 6.07              | Nucleus              |
| <i>PfR2R3-MYB65</i> | Paulownia_LG8G001508  | 906    | —      | 301        | 34,551.55               | C <sub>1553</sub> H <sub>2347</sub> N <sub>419</sub> O <sub>469</sub> S <sub>5</sub>    | 6.81              | Nucleus              |
| <i>PfR2R3-MYB66</i> | Paulownia_LG8G001510  | 795    | —      | 264        | 30,370.20               | C <sub>1354</sub> H <sub>2080</sub> N <sub>372</sub> O <sub>407</sub> S <sub>9</sub>    | 6.40              | Nucleus              |
| <i>PfR2R3-MYB67</i> | Paulownia_LG8G001516  | 915    | +      | 304        | 34,856.86               | C <sub>1561</sub> H <sub>2362</sub> N <sub>418</sub> O <sub>478</sub> S <sub>7</sub>    | 5.75              | Nucleus              |
| <i>PfR2R3-MYB68</i> | Paulownia_LG8G001572  | 1359   | +      | 452        | 48,990.49               | C <sub>2147</sub> H <sub>3304</sub> N <sub>610</sub> O <sub>676</sub> S <sub>16</sub>   | 5.57              | Nucleus              |
| <i>PfR2R3-MYB69</i> | Paulownia_LG9G000403  | 951    | —      | 316        | 35,339.52               | C <sub>1521</sub> H <sub>2408</sub> N <sub>448</sub> O <sub>491</sub> S <sub>16</sub>   | 7.00              | Nucleus              |
| <i>PfR2R3-MYB70</i> | Paulownia_LG9G000404  | 855    | —      | 284        | 32,542.59               | C <sub>1437</sub> H <sub>2202</sub> N <sub>406</sub> O <sub>433</sub> S <sub>14</sub>   | 6.87              | Nucleus              |
| <i>PfR2R3-MYB71</i> | Paulownia_LG9G000406  | 870    | —      | 289        | 32,829.71               | C <sub>1440</sub> H <sub>2219</sub> N <sub>401</sub> O <sub>452</sub> S <sub>14</sub>   | 5.70              | Nucleus              |
| <i>PfR2R3-MYB72</i> | Paulownia_LG9G000855  | 1452   | +      | 483        | 52,860.94               | C <sub>2281</sub> H <sub>3671</sub> N <sub>665</sub> O <sub>722</sub> S <sub>28</sub>   | 6.62              | Nucleus              |
| <i>PfR2R3-MYB73</i> | Paulownia_LG9G000973  | 2778   | —      | 925        | 104,983.70              | C <sub>4550</sub> H <sub>7375</sub> N <sub>1323</sub> O <sub>1453</sub> S <sub>35</sub> | 5.47              | Nucleus              |
| <i>PfR2R3-MYB74</i> | Paulownia_LG10G000032 | 930    | +      | 309        | 34,984.53               | C <sub>1522</sub> H <sub>2318</sub> N <sub>450</sub> O <sub>482</sub> S <sub>11</sub>   | 6.07              | Nucleus              |
| <i>PfR2R3-MYB75</i> | Paulownia_LG10G000082 | 1089   | +      | 362        | 40,516.23               | C <sub>1741</sub> H <sub>2745</sub> N <sub>519</sub> O <sub>560</sub> S <sub>19</sub>   | 6.34              | Nucleus              |
| <i>PfR2R3-MYB76</i> | Paulownia_LG10G000355 | 813    | +      | 270        | 31,025.82               | C <sub>1353</sub> H <sub>2093</sub> N <sub>381</sub> O <sub>424</sub> S <sub>17</sub>   | 5.69              | Nucleus              |
| <i>PfR2R3-MYB77</i> | Paulownia_LG10G000388 | 858    | +      | 285        | 32,373.88               | C <sub>1427</sub> H <sub>2182</sub> N <sub>404</sub> O <sub>447</sub> S <sub>7</sub>    | 6.26              | Nucleus              |

| <i>PfR2R3-MYB78</i>  | Paulownia_LG10G000389 | 858    | +      | 285        | 23,382.04               | C <sub>1430</sub> H <sub>2194</sub> N <sub>408</sub> O <sub>441</sub> S <sub>7</sub>    | 8.19              | Nucleus              |
|----------------------|-----------------------|--------|--------|------------|-------------------------|-----------------------------------------------------------------------------------------|-------------------|----------------------|
| Gene name            | Gene ID               | CDS/bp | Strand | Amino acid | relative molecular mass | Atomic composition                                                                      | Isoelectric point | Subcellular location |
| <i>PfR2R3-MYB79</i>  | Paulownia_LG10G000430 | 741    | +      | 246        | 29,067.75               | C <sub>1277</sub> H <sub>1989</sub> N <sub>387</sub> O <sub>376</sub> S <sub>9</sub>    | 8.90              | Nucleus              |
| <i>PfR2R3-MYB80</i>  | Paulownia_LG10G001062 | 1026   | +      | 341        | 37,298.08               | C <sub>1635</sub> H <sub>2572</sub> N <sub>476</sub> O <sub>499</sub> S <sub>13</sub>   | 8.56              | Nucleus              |
| <i>PfR2R3-MYB81</i>  | Paulownia_LG10G001105 | 714    | +      | 237        | 26,334.15               | C <sub>1123</sub> H <sub>1771</sub> N <sub>343</sub> O <sub>369</sub> S <sub>11</sub>   | 7.64              | Nucleus              |
| <i>PfR2R3-MYB82</i>  | Paulownia_LG10G001365 | 924    | —      | 307        | 34,085.28               | C <sub>1514</sub> H <sub>2309</sub> N <sub>407</sub> O <sub>464</sub> S <sub>14</sub>   | 5.69              | Nucleus              |
| <i>PfR2R3-MYB83</i>  | Paulownia_LG10G001370 | 714    | +      | 237        | 27,426.81               | C <sub>1200</sub> H <sub>1880</sub> N <sub>370</sub> O <sub>357</sub> S <sub>7</sub>    | 9.58              | Nucleus              |
| <i>PfR2R3-MYB84</i>  | Paulownia_LG10G001524 | 891    | —      | 296        | 33,075.27               | C <sub>1438</sub> H <sub>2258</sub> N <sub>422</sub> O <sub>444</sub> S <sub>16</sub>   | 8.84              | Nucleus              |
| <i>PfR2R3-MYB85</i>  | Paulownia_LG12G000038 | 972    | +      | 323        | 35,634.70               | C <sub>1517</sub> H <sub>2421</sub> N <sub>459</sub> O <sub>500</sub> S <sub>17</sub>   | 5.34              | Nucleus              |
| <i>PfR2R3-MYB86</i>  | Paulownia_LG12G000233 | 747    | +      | 248        | 28,179.51               | C <sub>1229</sub> H <sub>1888</sub> N <sub>348</sub> O <sub>385</sub> S <sub>15</sub>   | 5.45              | Nucleus              |
| <i>PfR2R3-MYB87</i>  | Paulownia_LG12G000384 | 1062   | +      | 353        | 39,303.93               | C <sub>1693</sub> H <sub>2652</sub> N <sub>486</sub> O <sub>549</sub> S <sub>22</sub>   | 5.18              | Nucleus              |
| <i>PfR2R3-MYB88</i>  | Paulownia_LG12G000483 | 1653   | —      | 550        | 60,154.67               | C <sub>2606</sub> H <sub>4028</sub> N <sub>734</sub> O <sub>853</sub> S <sub>27</sub>   | 5.20              | Nucleus              |
| <i>PfR2R3-MYB89</i>  | Paulownia_LG12G000671 | 1005   | +      | 334        | 37,658.00               | C <sub>1650</sub> H <sub>2516</sub> N <sub>454</sub> O <sub>521</sub> S <sub>19</sub>   | 6.32              | Nucleus              |
| <i>PfR2R3-MYB90</i>  | Paulownia_LG12G000796 | 744    | +      | 247        | 28,711.23               | C <sub>1259</sub> H <sub>1941</sub> N <sub>361</sub> O <sub>385</sub> S <sub>13</sub>   | 8.32              | Nucleus              |
| <i>PfR2R3-MYB91</i>  | Paulownia_LG11G000146 | 1008   | +      | 335        | 37,465.55               | C <sub>1655</sub> H <sub>2585</sub> N <sub>463</sub> O <sub>497</sub> S <sub>17</sub>   | 6.63              | Nucleus              |
| <i>PfR2R3-MYB92</i>  | Paulownia_LG11G000237 | 909    | +      | 302        | 34,215.57               | C <sub>1500</sub> H <sub>2335</sub> N <sub>399</sub> O <sub>478</sub> S <sub>19</sub>   | 4.77              | Nucleus              |
| <i>PfR2R3-MYB93</i>  | Paulownia_LG11G000431 | 1017   | +      | 338        | 37,245.88               | C <sub>1606</sub> H <sub>2508</sub> N <sub>480</sub> O <sub>498</sub> S <sub>23</sub>   | 9.12              | Nucleus              |
| <i>PfR2R3-MYB94</i>  | Paulownia_LG11G000525 | 627    | +      | 204        | 23,139.23               | C <sub>1010</sub> H <sub>1607</sub> N <sub>291</sub> O <sub>312</sub> S <sub>10</sub>   | 8.57              | Nucleus              |
| <i>PfR2R3-MYB95</i>  | Paulownia_LG11G000585 | 1122   | —      | 373        | 42,382.33               | C <sub>1872</sub> H <sub>2966</sub> N <sub>532</sub> O <sub>559</sub> S <sub>16</sub>   | 8.89              | Nucleus              |
| <i>PfR2R3-MYB96</i>  | Paulownia_LG11G000721 | 1065   | +      | 354        | 40,040.94               | C <sub>1764</sub> H <sub>2728</sub> N <sub>502</sub> O <sub>539</sub> S <sub>14</sub>   | 8.45              | Nucleus              |
| <i>PfR2R3-MYB97</i>  | Paulownia_LG11G000791 | 1014   | —      | 337        | 36,985.03               | C <sub>1611</sub> H <sub>2561</sub> N <sub>467</sub> O <sub>494</sub> S <sub>19</sub>   | 8.92              | Nucleus              |
| <i>PfR2R3-MYB98</i>  | Paulownia_LG11G000921 | 723    | —      | 240        | 27,760.94               | C <sub>1218</sub> H <sub>1870</sub> N <sub>346</sub> O <sub>380</sub> S <sub>10</sub>   | 6.91              | Nucleus              |
| <i>PfR2R3-MYB99</i>  | Paulownia_LG11G000981 | 1137   | —      | 378        | 41,022.65               | C <sub>1780</sub> H <sub>2783</sub> N <sub>519</sub> O <sub>570</sub> S <sub>14</sub>   | 6.38              | Nucleus              |
| <i>PfR2R3-MYB100</i> | Paulownia_LG11G000996 | 978    | —      | 325        | 36,277.45               | C <sub>1569</sub> H <sub>2451</sub> N <sub>441</sub> O <sub>513</sub> S <sub>18</sub>   | 5.94              | Nucleus              |
| <i>PfR2R3-MYB101</i> | Paulownia_LG11G001072 | 591    | —      | 196        | 22,480.13               | C <sub>973</sub> H <sub>1509</sub> N <sub>293</sub> O <sub>301</sub> S <sub>11</sub>    | 7.74              | Nucleus              |
| <i>PfR2R3-MYB102</i> | Paulownia_LG13G000074 | 591    | +      | 196        | 22,252.21               | C <sub>975</sub> H <sub>1561</sub> N <sub>285</sub> O <sub>299</sub> S <sub>6</sub>     | 9.13              | Nucleus              |
| <i>PfR2R3-MYB103</i> | Paulownia_LG13G000111 | 1149   | +      | 382        | 41,985.07               | C <sub>1855</sub> H <sub>2858</sub> N <sub>510</sub> O <sub>575</sub> S <sub>15</sub>   | 6.05              | Nucleus              |
| <i>PfR2R3-MYB104</i> | Paulownia_LG13G000788 | 972    | —      | 323        | 36,038.29               | C <sub>1571</sub> H <sub>2454</sub> N <sub>446</sub> O <sub>500</sub> S <sub>14</sub>   | 6.02              | Nucleus              |
| <i>PfR2R3-MYB105</i> | Paulownia_LG13G000910 | 1317   | +      | 438        | 49,657.50               | C <sub>2179</sub> H <sub>3358</sub> N <sub>608</sub> O <sub>684</sub> S <sub>20</sub>   | 5.36              | Nucleus              |
| <i>PfR2R3-MYB106</i> | Paulownia_LG13G000946 | 741    | +      | 246        | 28,030.36               | C <sub>1226</sub> H <sub>1909</sub> N <sub>351</sub> O <sub>384</sub> S <sub>10</sub>   | 7.66              | Nucleus              |
| <i>PfR2R3-MYB107</i> | Paulownia_LG13G001006 | 771    | —      | 256        | 29,980.44               | C <sub>1305</sub> H <sub>2029</sub> N <sub>407</sub> O <sub>394</sub> S <sub>8</sub>    | 8.55              | Nucleus              |
| <i>PfR2R3-MYB108</i> | Paulownia_LG15G000372 | 774    | —      | 257        | 29,419.04               | C <sub>1281</sub> H <sub>2026</sub> N <sub>390</sub> O <sub>392</sub> S <sub>8</sub>    | 9.19              | Nucleus              |
| <i>PfR2R3-MYB109</i> | Paulownia_LG15G000984 | 1032   | +      | 343        | 38,276.32               | C <sub>1683</sub> H <sub>2655</sub> N <sub>477</sub> O <sub>516</sub> S <sub>14</sub>   | 7.63              | Nucleus              |
| <i>PfR2R3-MYB110</i> | Paulownia_LG15G001029 | 1308   | +      | 435        | 48,880.01               | C <sub>2133</sub> H <sub>3290</sub> N <sub>606</sub> O <sub>690</sub> S <sub>13</sub>   | 5.47              | Nucleus              |
| <i>PfR2R3-MYB111</i> | Paulownia_LG15G001074 | 1149   | —      | 382        | 42,475.72               | C <sub>1889</sub> H <sub>2957</sub> N <sub>527</sub> O <sub>547</sub> S <sub>21</sub>   | 8.66              | Nucleus              |
| <i>PfR2R3-MYB112</i> | Paulownia_LG15G001153 | 705    | —      | 234        | 26,208.30               | C <sub>1128</sub> H <sub>1785</sub> N <sub>339</sub> O <sub>360</sub> S <sub>11</sub>   | 9.04              | Nucleus              |
| <i>PfR2R3-MYB113</i> | Paulownia_LG16G000157 | 798    | +      | 265        | 30,111.35               | C <sub>1330</sub> H <sub>2030</sub> N <sub>380</sub> O <sub>413</sub> S <sub>5</sub>    | 6.71              | Nucleus              |
| <i>PfR2R3-MYB114</i> | Paulownia_LG16G000162 | 1032   | —      | 343        | 38,686.47               | C <sub>1696</sub> H <sub>2661</sub> N <sub>481</sub> O <sub>530</sub> S <sub>13</sub>   | 6.25              | Nucleus              |
| <i>PfR2R3-MYB115</i> | Paulownia_LG16G000742 | 3516   | —      | 1171       | 129,740.84              | C <sub>5648</sub> H <sub>8940</sub> N <sub>1584</sub> O <sub>1845</sub> S <sub>37</sub> | 5.90              | Nucleus              |
| <i>PfR2R3-MYB116</i> | Paulownia_LG16G000801 | 1047   | —      | 348        | 38,850.15               | C <sub>1696</sub> H <sub>2641</sub> N <sub>477</sub> O <sub>549</sub> S <sub>11</sub>   | 5.66              | Nucleus              |
| <i>PfR2R3-MYB117</i> | Paulownia_LG16G000857 | 966    | —      | 321        | 35,652.19               | C <sub>1562</sub> H <sub>2456</sub> N <sub>450</sub> O <sub>481</sub> S <sub>13</sub>   | 6.67              | Nucleus              |

| <i>PfR2R3-MYB118</i> | Paulownia_LG16G001109 | 1062   | —      | 353        | 40,023.86               | C <sub>1752</sub> H <sub>2737</sub> N <sub>499</sub> O <sub>549</sub> S <sub>14</sub>   | 6.31              | Nucleus              |
|----------------------|-----------------------|--------|--------|------------|-------------------------|-----------------------------------------------------------------------------------------|-------------------|----------------------|
| Gene name            | Gene ID               | CDS/bp | Strand | Amino acid | relative molecular mass | Atomic composition                                                                      | Isoelectric point | Subcellular location |
| <i>PfR2R3-MYB119</i> | Paulownia_LG14G000136 | 894    | —      | 297        | 33,915.97               | C <sub>1487</sub> H <sub>2318</sub> N <sub>422</sub> O <sub>466</sub> S <sub>11</sub>   | 6.10              | Nucleus              |
| <i>PfR2R3-MYB120</i> | Paulownia_LG14G000379 | 1017   | —      | 338        | 37,750.88               | C <sub>1652</sub> H <sub>2612</sub> N <sub>484</sub> O <sub>497</sub> S <sub>17</sub>   | 8.97              | Nucleus              |
| <i>PfR2R3-MYB121</i> | Paulownia_LG14G000391 | 1218   | +      | 405        | 44,932.06               | C <sub>1960</sub> H <sub>2970</sub> N <sub>556</sub> O <sub>611</sub> S <sub>26</sub>   | 5.71              | Nucleus              |
| <i>PfR2R3-MYB122</i> | Paulownia_LG14G000438 | 1443   | +      | 480        | 53,944.28               | C <sub>2334</sub> H <sub>3688</sub> N <sub>666</sub> O <sub>760</sub> S <sub>22</sub>   | 5.59              | Nucleus              |
| <i>PfR2R3-MYB123</i> | Paulownia_LG14G000712 | 684    | —      | 227        | 26,205.90               | C <sub>1144</sub> H <sub>1788</sub> N <sub>326</sub> O <sub>343</sub> S <sub>19</sub>   | 6.23              | Nucleus              |
| <i>PfR2R3-MYB124</i> | Paulownia_LG18G000728 | 936    | +      | 311        | 34,954.82               | C <sub>1515</sub> H <sub>2340</sub> N <sub>434</sub> O <sub>488</sub> S <sub>16</sub>   | 5.22              | Nucleus              |
| <i>PfR2R3-MYB125</i> | Paulownia_LG18G000924 | 819    | —      | 272        | 31,066.74               | C <sub>1353</sub> H <sub>2084</sub> N <sub>388</sub> O <sub>423</sub> S <sub>16</sub>   | 5.25              | Nucleus              |
| <i>PfR2R3-MYB126</i> | Paulownia_LG18G001019 | 621    | —      | 206        | 23,703.70               | C <sub>1032</sub> H <sub>1647</sub> N <sub>313</sub> O <sub>317</sub> S <sub>6</sub>    | 9.37              | Nucleus              |
| <i>PfR2R3-MYB127</i> | Paulownia_LG18G001150 | 1176   | +      | 391        | 43,768.10               | C <sub>1902</sub> H <sub>3013</sub> N <sub>555</sub> O <sub>602</sub> S <sub>15</sub>   | 7.62              | Nucleus              |
| <i>PfR2R3-MYB128</i> | Paulownia_LG17G000049 | 930    | +      | 309        | 34,888.50               | C <sub>1515</sub> H <sub>2318</sub> N <sub>448</sub> O <sub>481</sub> S <sub>12</sub>   | 6.45              | Nucleus              |
| <i>PfR2R3-MYB129</i> | Paulownia_LG17G000125 | 1068   | +      | 355        | 39,993.62               | C <sub>1717</sub> H <sub>2711</sub> N <sub>507</sub> O <sub>558</sub> S <sub>19</sub>   | 5.82              | Nucleus              |
| <i>PfR2R3-MYB130</i> | Paulownia_LG17G000576 | 768    | +      | 255        | 29,393.99               | C <sub>1277</sub> H <sub>1991</sub> N <sub>361</sub> O <sub>405</sub> S <sub>16</sub>   | 5.68              | Nucleus              |
| <i>PfR2R3-MYB131</i> | Paulownia_LG17G000624 | 834    | —      | 277        | 31,203.81               | C <sub>1374</sub> H <sub>2095</sub> N <sub>379</sub> O <sub>429</sub> S <sub>13</sub>   | 5.79              | Nucleus              |
| <i>PfR2R3-MYB132</i> | Paulownia_LG17G000682 | 717    | +      | 238        | 28,057.58               | C <sub>1244</sub> H <sub>1922</sub> N <sub>372</sub> O <sub>361</sub> S <sub>6</sub>    | 9.47              | Nucleus              |
| <i>PfR2R3-MYB133</i> | Paulownia_LG19G000304 | 651    | +      | 216        | 24,446.22               | C <sub>1071</sub> H <sub>1657</sub> N <sub>317</sub> O <sub>330</sub> S <sub>6</sub>    | 7.03              | Nucleus              |
| <i>PfR2R3-MYB134</i> | Paulownia_LG19G000353 | 2922   | +      | 973        | 109,162.82              | C <sub>4722</sub> H <sub>7660</sub> N <sub>1370</sub> O <sub>1536</sub> S <sub>30</sub> | 5.08              | Nucleus              |
| <i>PfR2R3-MYB135</i> | Paulownia_LG19G000502 | 1383   | —      | 460        | 50,242.42               | C <sub>2169</sub> H <sub>3454</sub> N <sub>632</sub> O <sub>697</sub> S <sub>22</sub>   | 6.10              | Nucleus              |
| <i>PfR2R3-MYB136</i> | Paulownia_LG19G000573 | 789    | +      | 262        | 28,543.75               | C <sub>1214</sub> H <sub>1956</sub> N <sub>382</sub> O <sub>397</sub> S <sub>9</sub>    | 5.94              | Nucleus              |
| <i>PfR2R3-MYB137</i> | Paulownia_LG19G000796 | 828    | +      | 275        | 31,260.10               | C <sub>1374</sub> H <sub>2123</sub> N <sub>389</sub> O <sub>422</sub> S <sub>13</sub>   | 6.59              | Nucleus              |
| <i>PfR2R3-MYB138</i> | Paulownia_LG19G000797 | 963    | +      | 320        | 35,770.87               | C <sub>1536</sub> H <sub>2449</sub> N <sub>455</sub> O <sub>504</sub> S <sub>13</sub>   | 6.42              | Nucleus              |
