# Supplementary material for: Genome-Wide Analysis of Specific PfR2R3-MYB Genes Related to Paulownia Witches’ Broom
Source: MDPI journal article supplement (doi:10.3390/genes14010007), 2022-12-20
Supplement: s1 [file s1]

**Table S1.** The primers used for qRT-PCR in PF and PFI

| Gene           | Forward primer sequences (5'-3') | Reverse primer sequence (5'-3') |
|----------------|----------------------------------|---------------------------------|
| PfR2R3-MYB3    | AGCCCTCCTTTTCACAGGTC             | TGGCCCTATTGTTGGCTACTG           |
| PfR2R3-MYB5    | GGCACAATGGGAGAGTGCTA             | CCTGCCCCGATGTATTCAGT            |
| PfR2R3-MYB15   | TGTCCTGATAATATGTTGT              | AGCAGAAGGAAGTAATAC              |
| PfR2R3-MYB18   | CGGATCTCAAGCGAGGCAAC             | GCACCTTTCTCTAATCGGGCT           |
| PfR2R3-MYB24   | CACAACGGCCATGACAACTG             | ACCAGAATCATCCCCGAGA             |
| PfR2R3-MYB49   | AGCCTGACATTAAGCGTGGA             | TTGGATACTGGTGAAGGGGC            |
| PfR2R3-MYB116  | CGCCTGAAGAAGAGCAAACC             | ATTGGGGTCCTGATTCCCAC            |
| PfR2R3-MYB128  | CCGCTGGAAGTCTCTTGCTC             | AGGTGGTAAGTAGTGGGGGT            |
| <i>PtActin</i> | GTATCCACGAGACTACTTACAA           | CCACCACTGAGCACAATA              |
| <i>PfRAX2</i>  | ACCACCAACAACCTTCATA              | GACAACATATTATCAGGACAA           |

PF, *Paulownia fortunei* seedlings; PFI, phytoplasma-infected *Paulownia fortunei* seedlings.
