# Supplementary material for: Genome-Wide Analysis of Specific PfR2R3-MYB Genes Related to Paulownia Witches’ Broom
Source: MDPI journal article supplement (doi:10.3390/genes14010007), 2022-12-20
Supplement: s1 [file s1]

**Table S2** Primers of 35S::*PfR2R3-MYB15-GFP* and 35S::*GFP* were designed

| Gene             | Forward primer (5'-3')                | Reverse primer (5'-3')                |
|------------------|---------------------------------------|---------------------------------------|
| PfR2R3-MYB15-GFP | GTGGATCCAAAGAATTCATGGGAAGAGCACCTTGCTG | CTCCTTTACCCATGAATTCTGGATAGGCAAAATTGAG |
| GFP              | TTCCAAGTTACCATCCATT                   | TCCAAGCATATATTCCCATT                  |
